# Supplementary material for: Clinical significance of Annexin A2 expression in oral squamous cell carcinoma and its influence on cell proliferation, migration and invasion
Source: PubMed Central journal article supplement (PMC7930260; doi:10.1038/s41598-021-84675-y), 2021-03-03
Supplement: 41598_2021_84675_MOESM1_ESM.pdf [file 41598_2021_84675_MOESM1_ESM.pdf]

**Clinical significance of Annexin A2 expression in oral squamous cell carcinoma and its influence on cell proliferation, migration and invasion**

Yingyi Ma<sup>1</sup>, Haiye Wang<sup>2</sup>

<sup>1</sup>Department of Periodontal, The First Affiliated Hospital of Zhengzhou University, Henan Provincial Stomatology Hospital, Zhengzhou 450052, Henan Province, China.

<sup>2</sup>Special department, The First Affiliated Hospital of Zhengzhou University, Henan Provincial Stomatology Hospital, Zhengzhou 450052, Henan Province, China.

**Corresponding to:** Haiye Wang

E-mail: wh\_zyfck@163.com

**Address:** Special department, The First Affiliated Hospital of Zhengzhou University, Henan Provincial Stomatology Hospital, No.1 Jianshe East Road, Zhengzhou 450052, Henan Province, China.

Tel: +8615838126816.

Transwell-HSC-3-Blank(1)

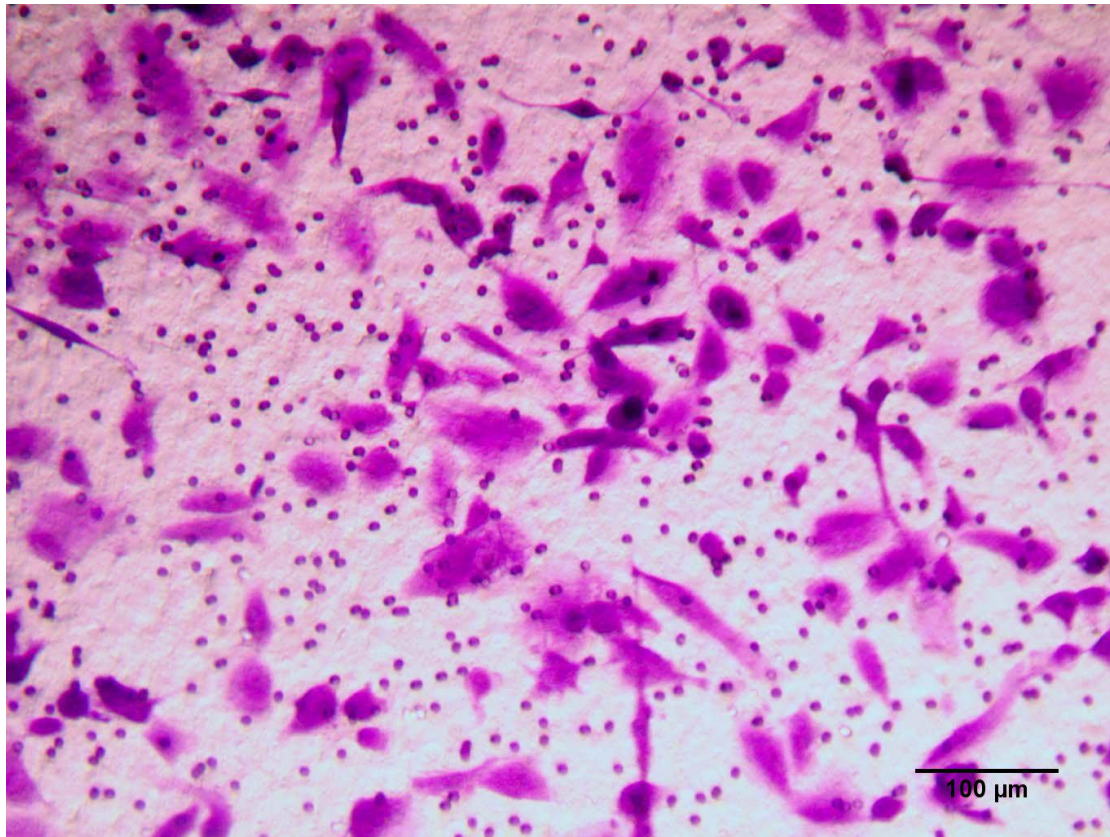

Transwell-HSC-3-Blank(2)

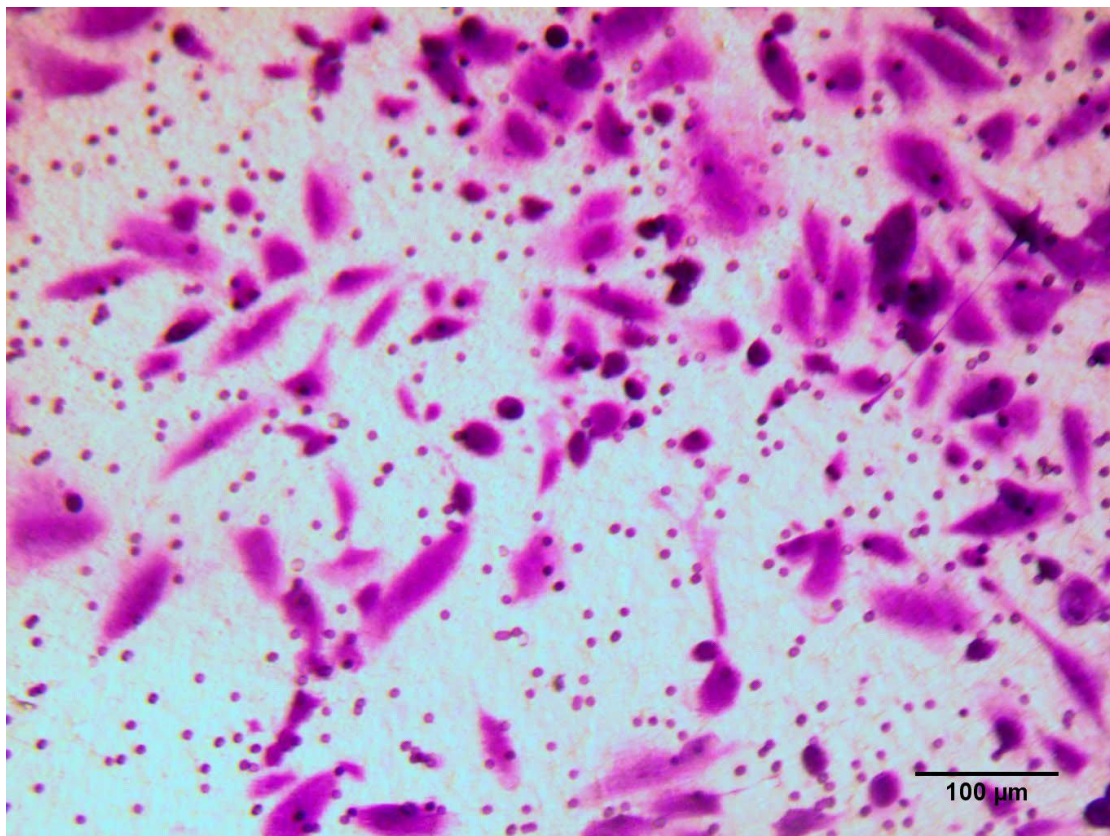

Transwell-HSC-3-Blank(3)

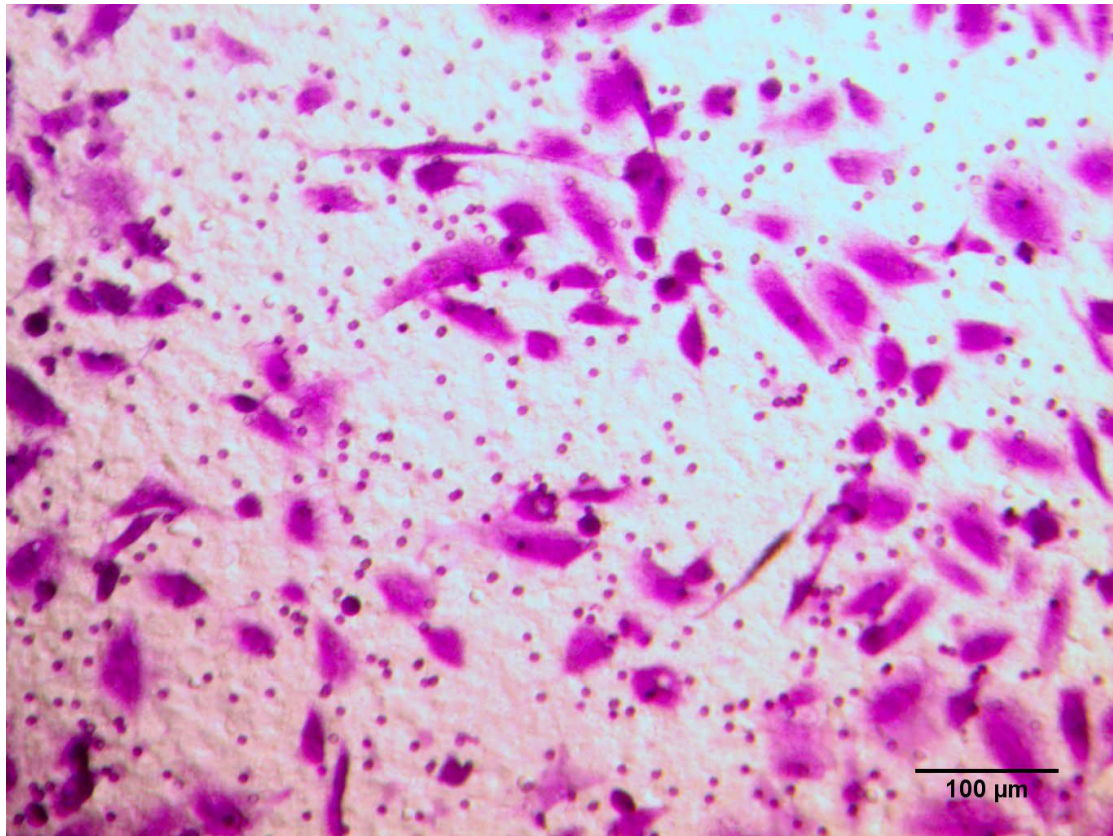

Transwell-HSC-3-Blank(4)

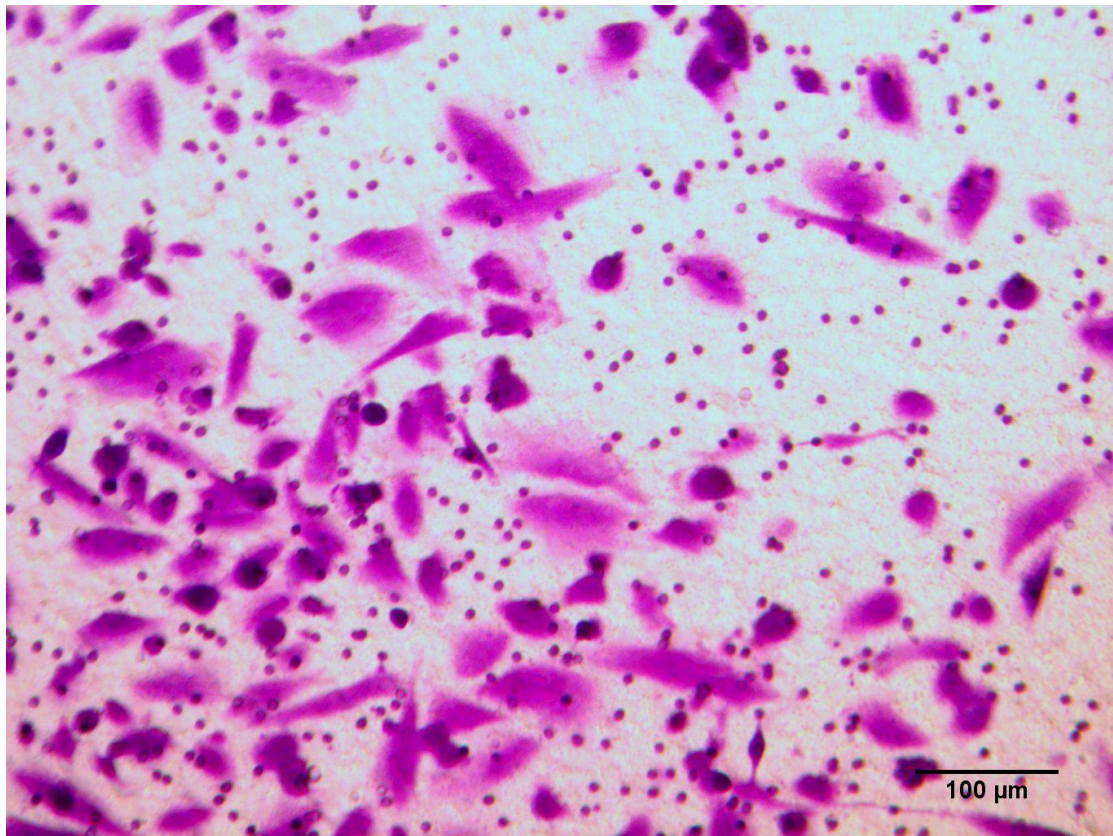

Transwell-HSC-3-Blank(5)

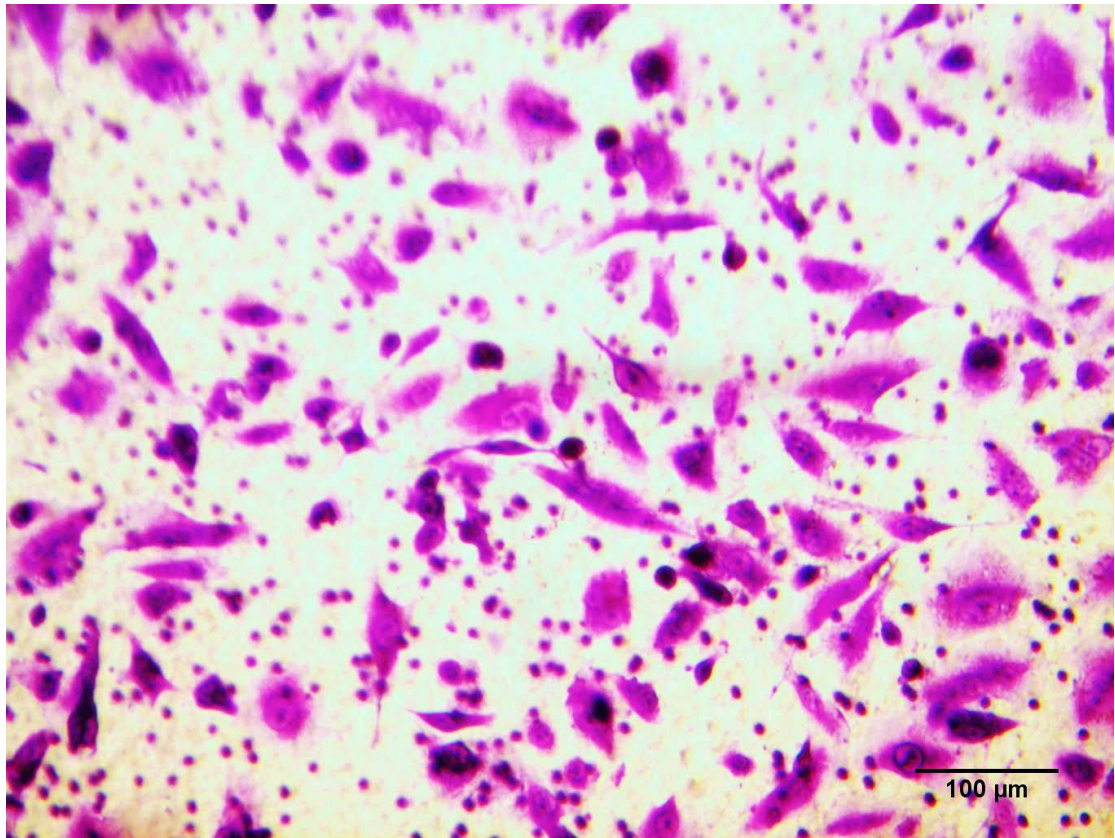

Transwell-HSC-3-NC(1)

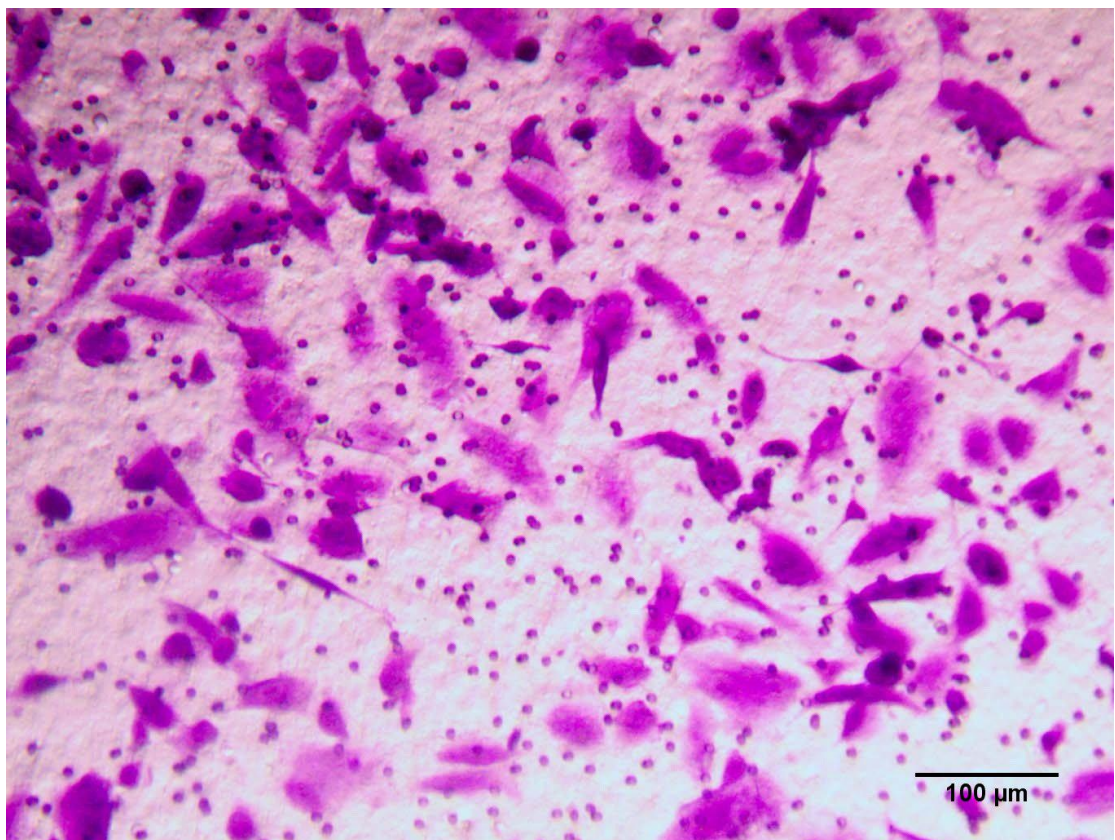

Transwell-HSC-3-NC(2)

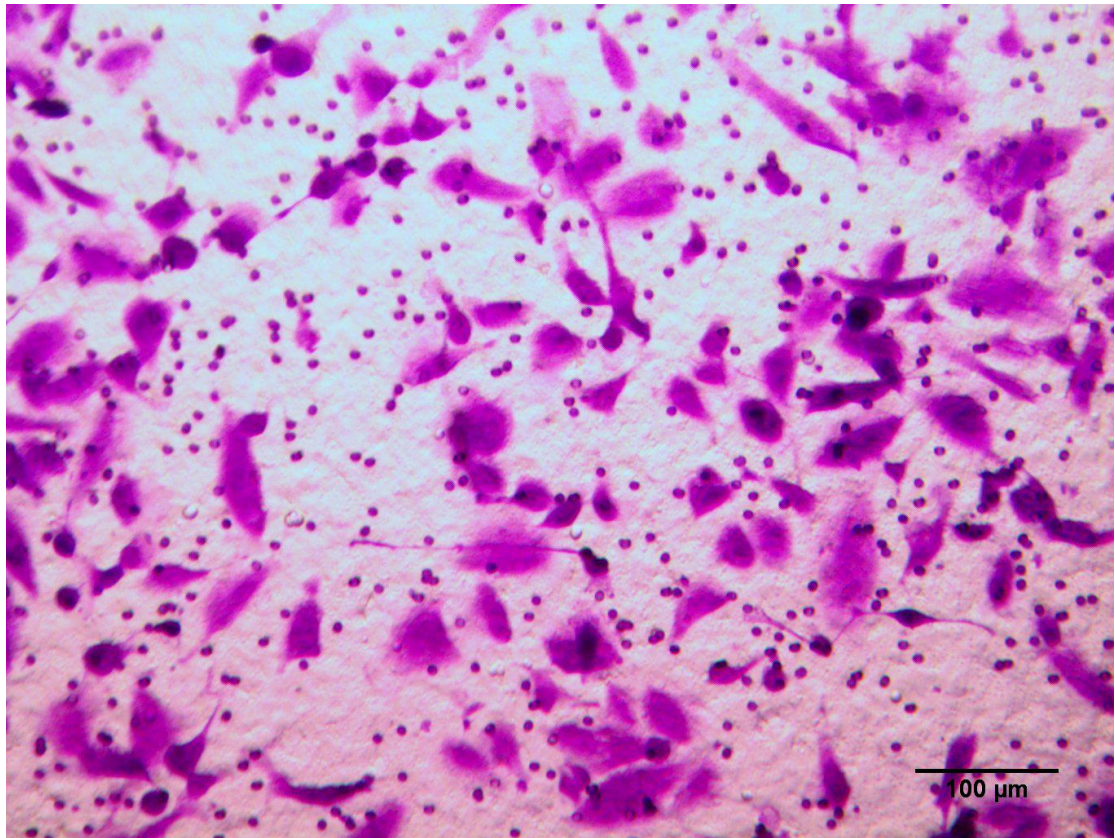

Transwell-HSC-3-NC(3)

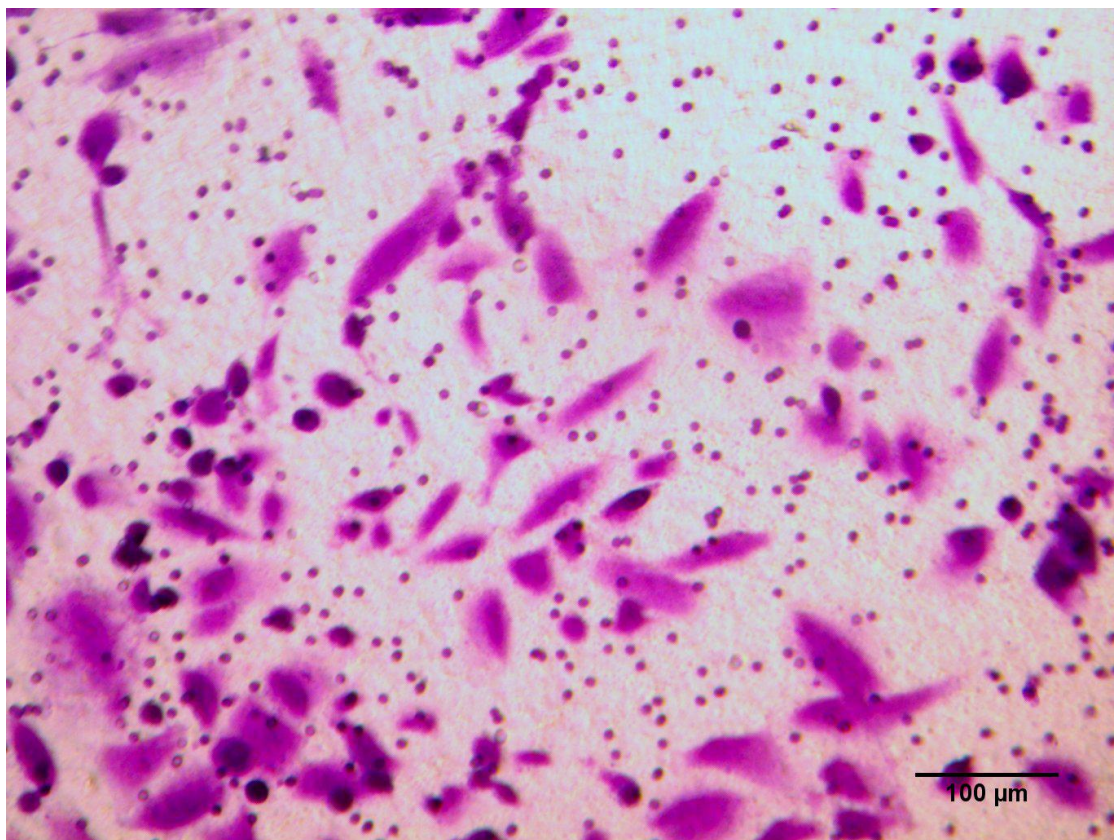

Transwell-HSC-3-NC(4)

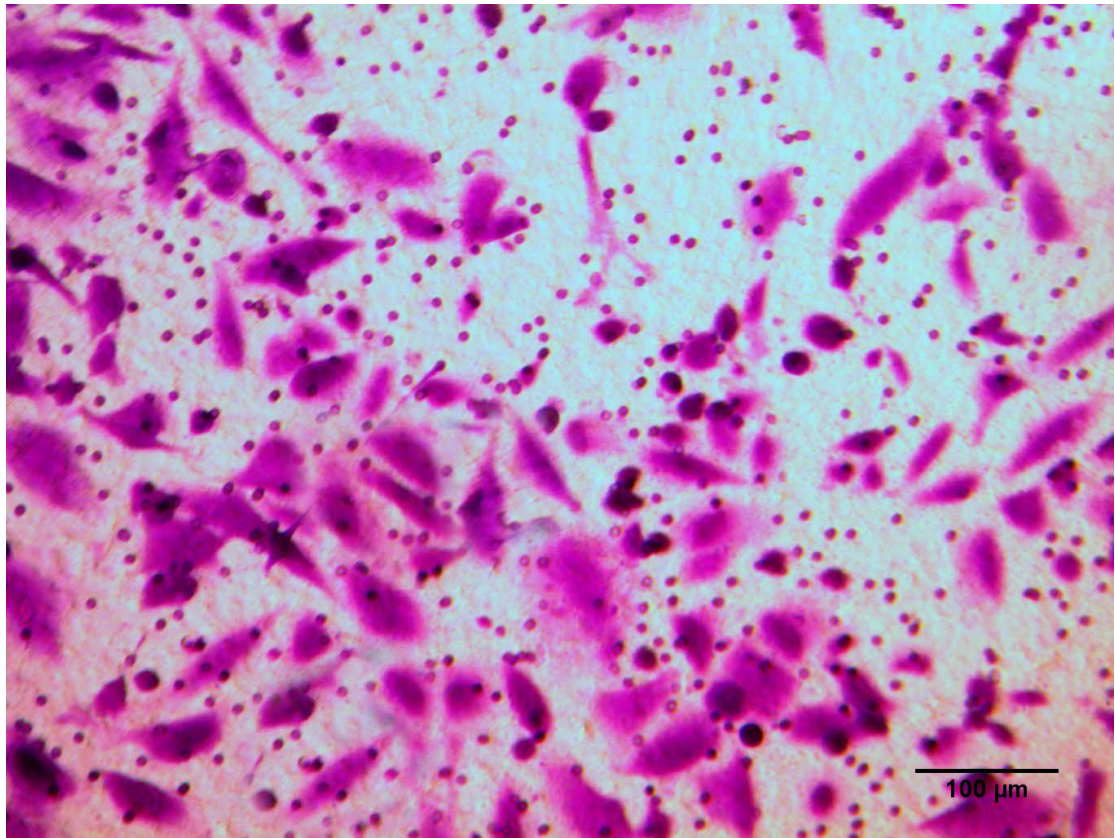

Transwell-HSC-3-NC(5)

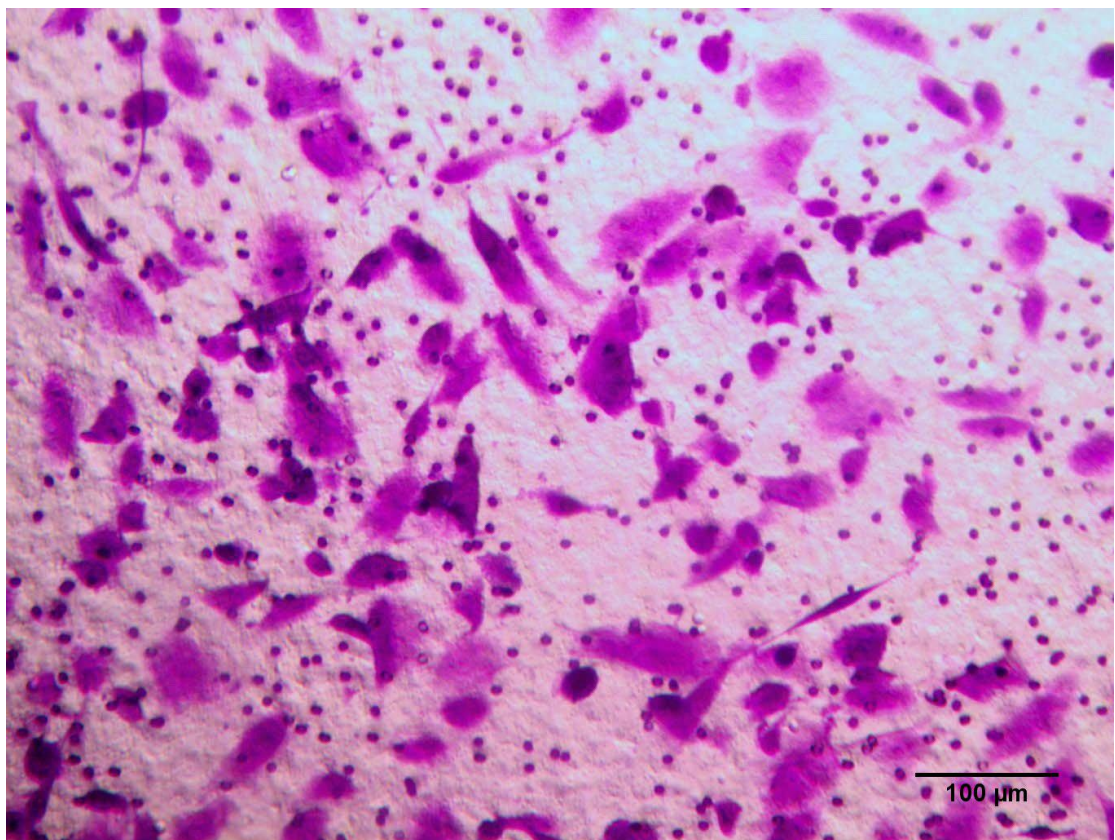

Transwell-HSC-3-siRNA(1)

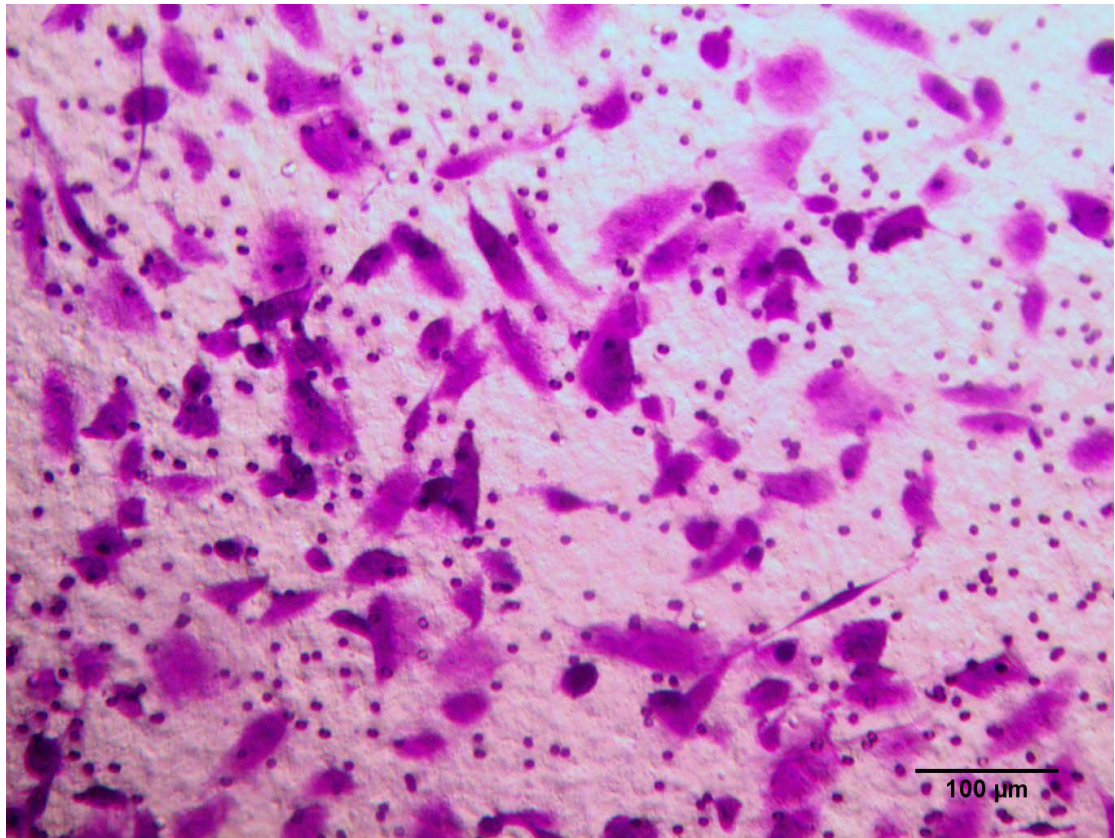

Transwell-HSC-3-siRNA(2)

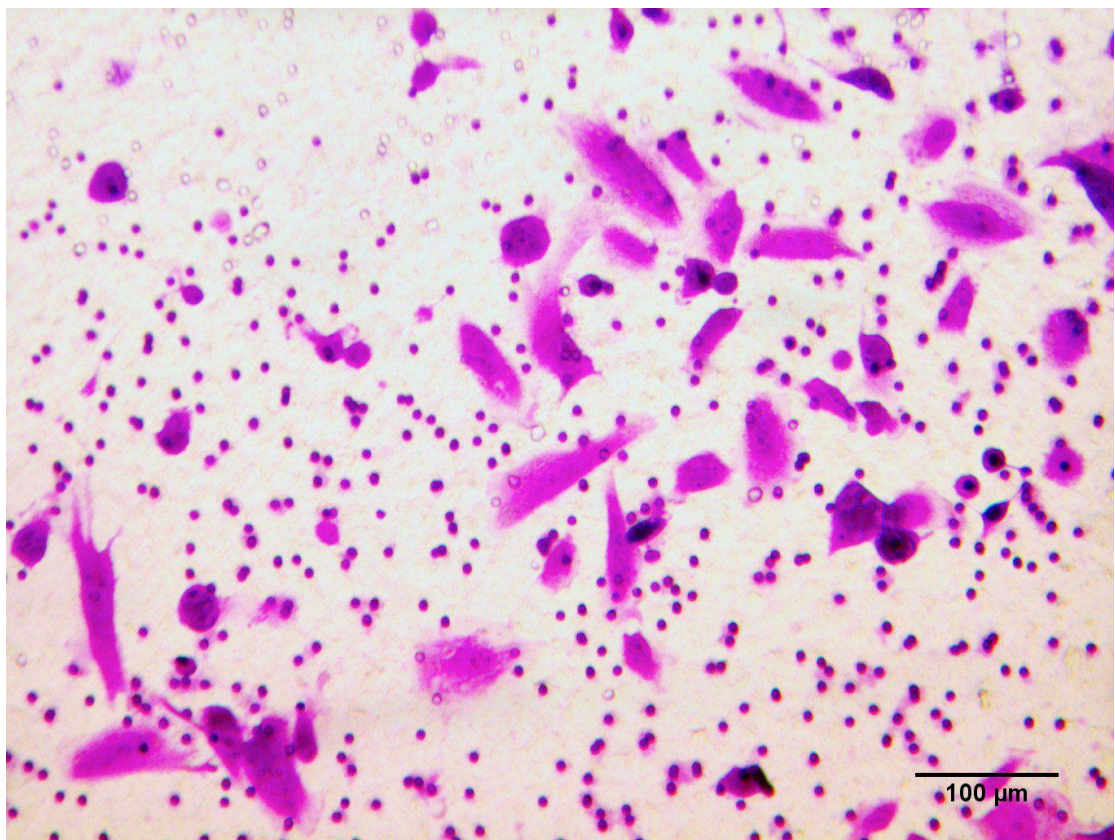

Transwell-HSC-3-siRNA(3)

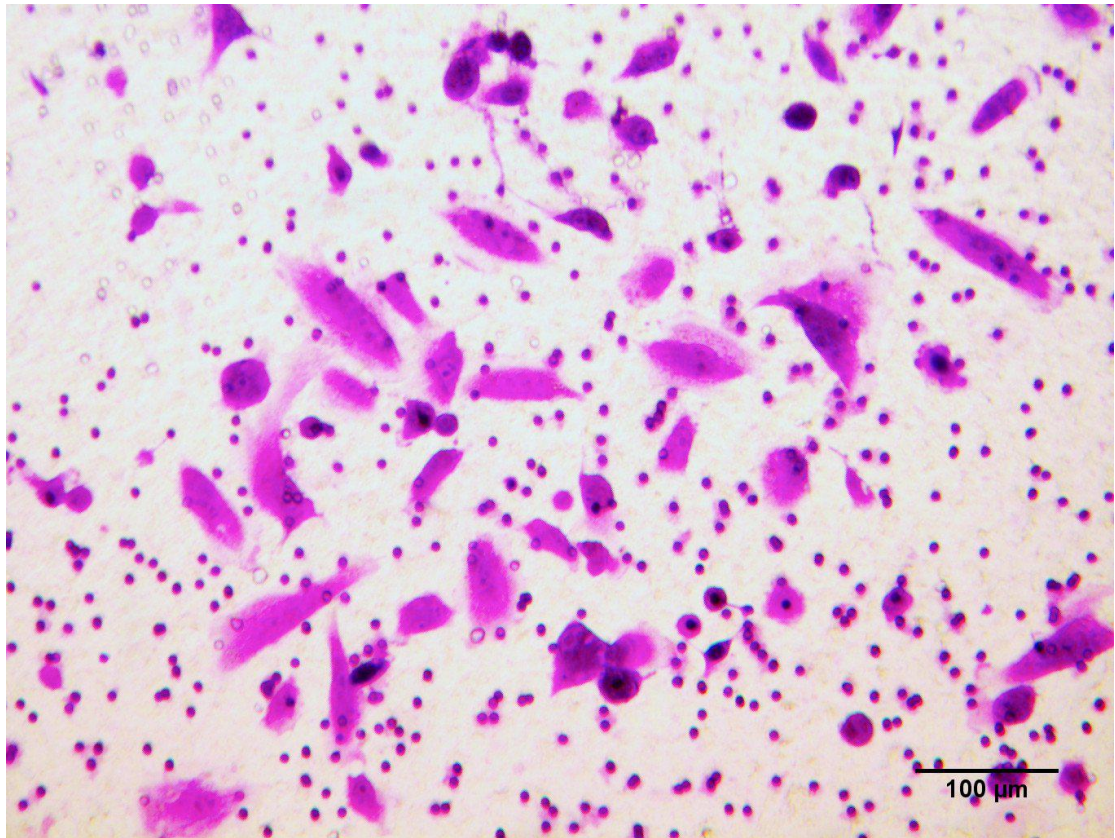

Transwell-HSC-3-siRNA(4)

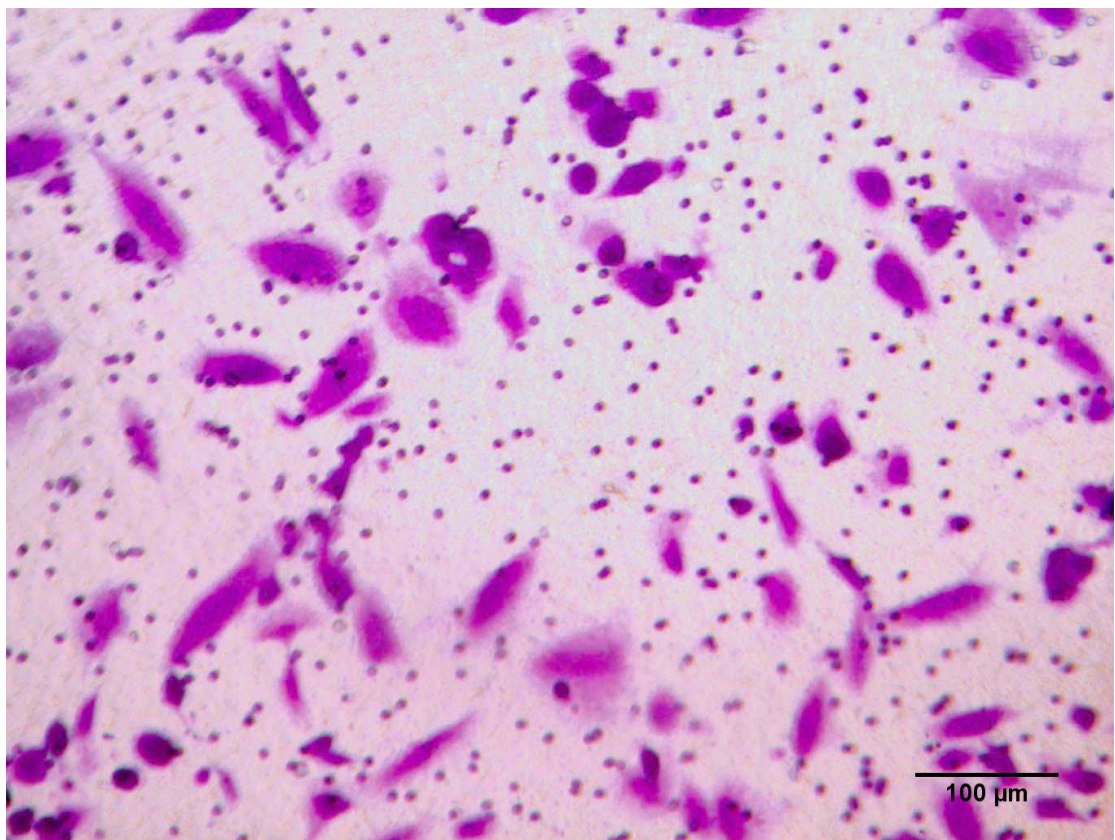

Transwell-HSC-3-siRNA(5)



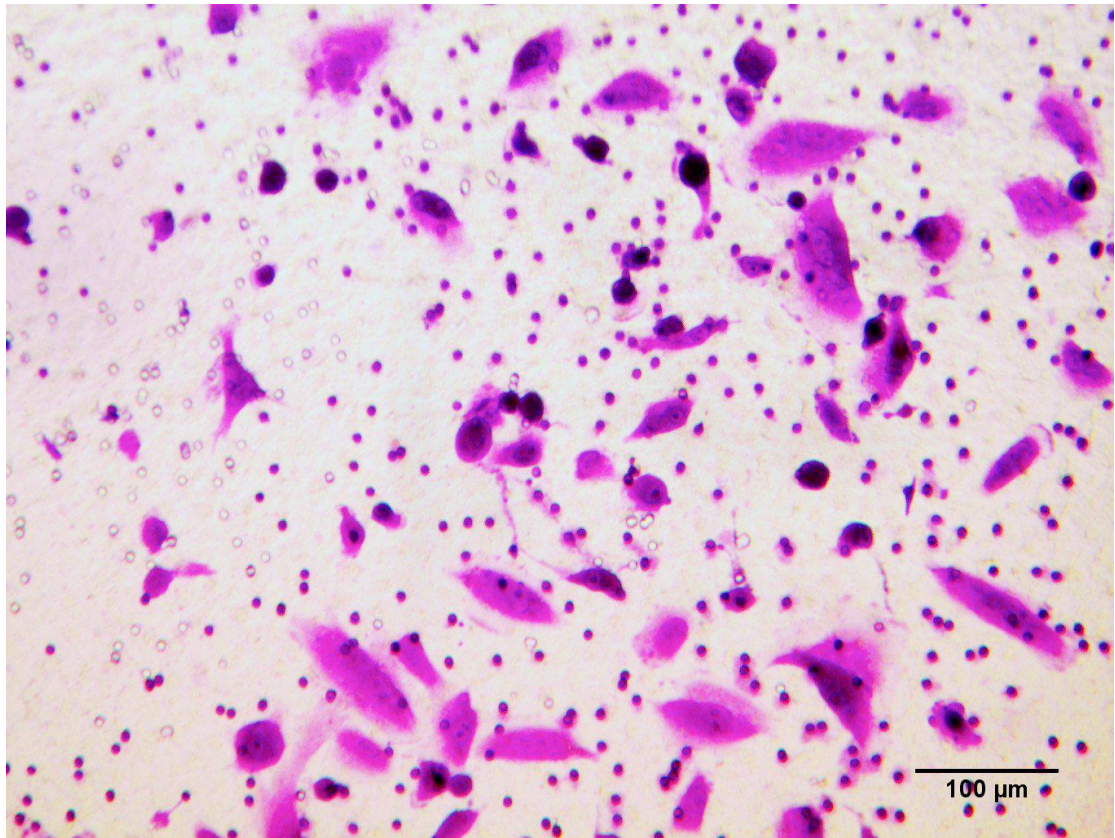

Transwell-SCC-4-Blank(1)

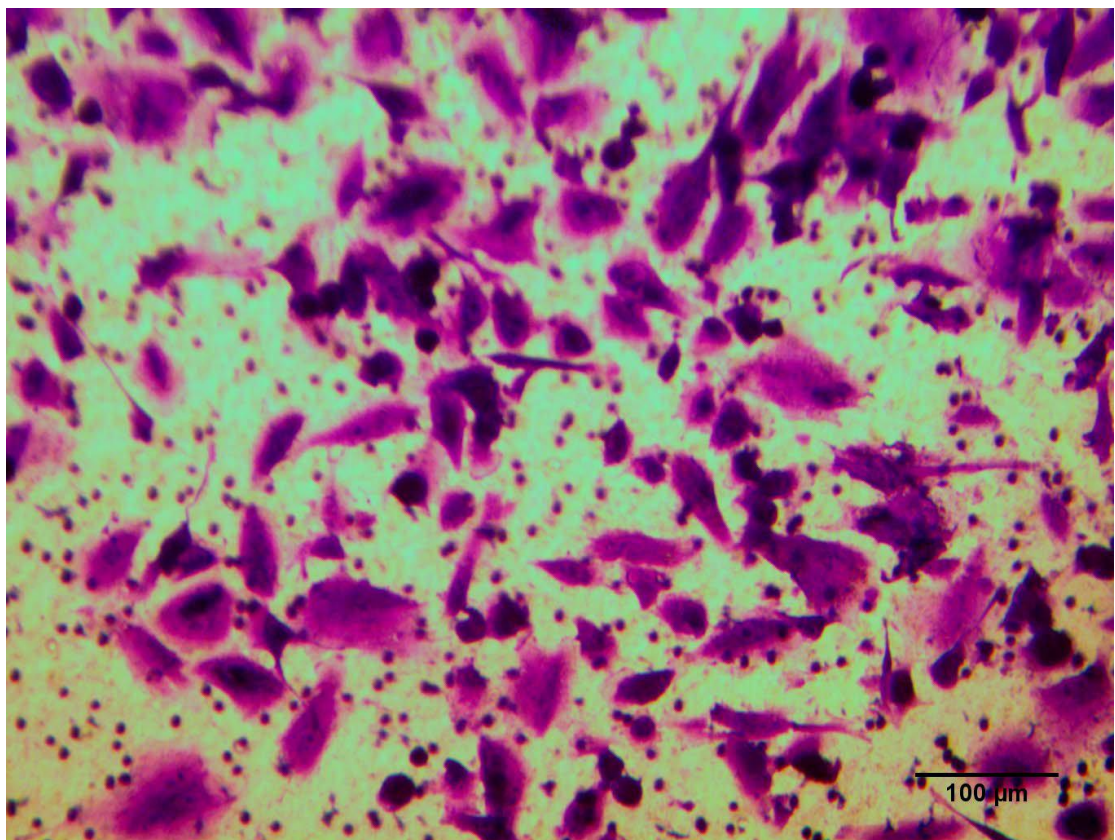

Transwell-SCC-4-Blank(2)

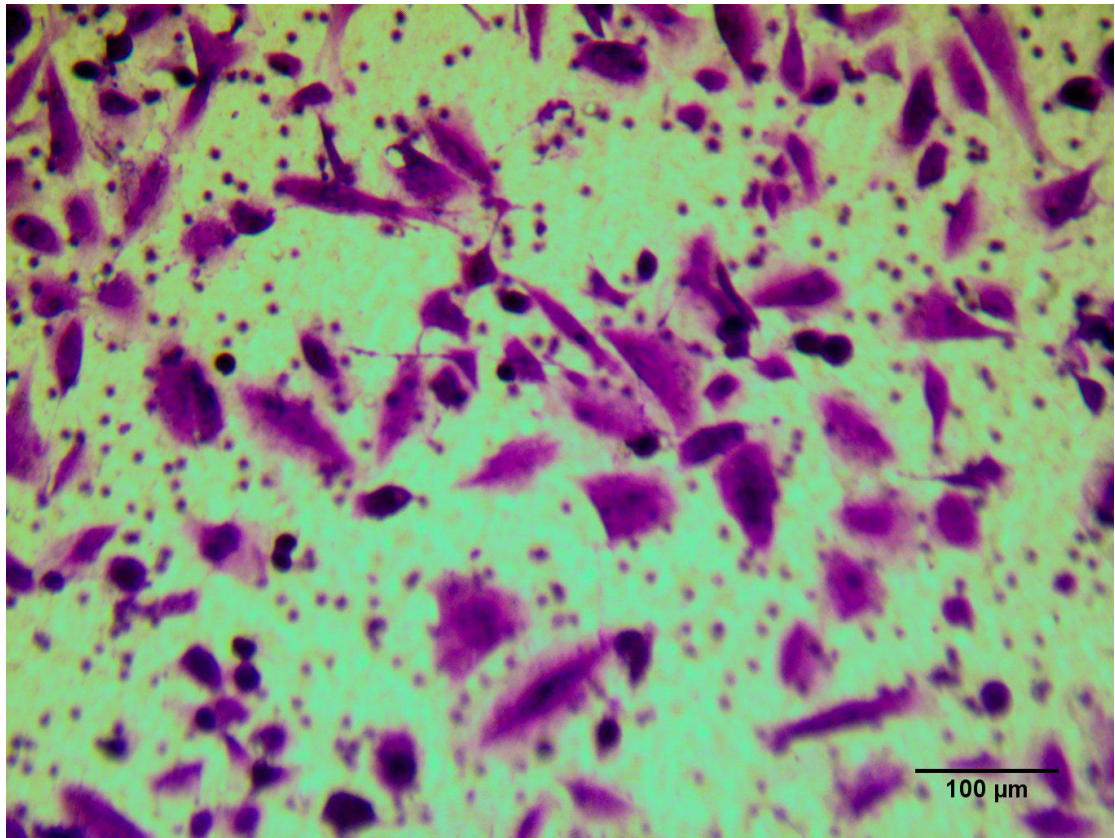

Transwell-SCC-4-Blank(3)

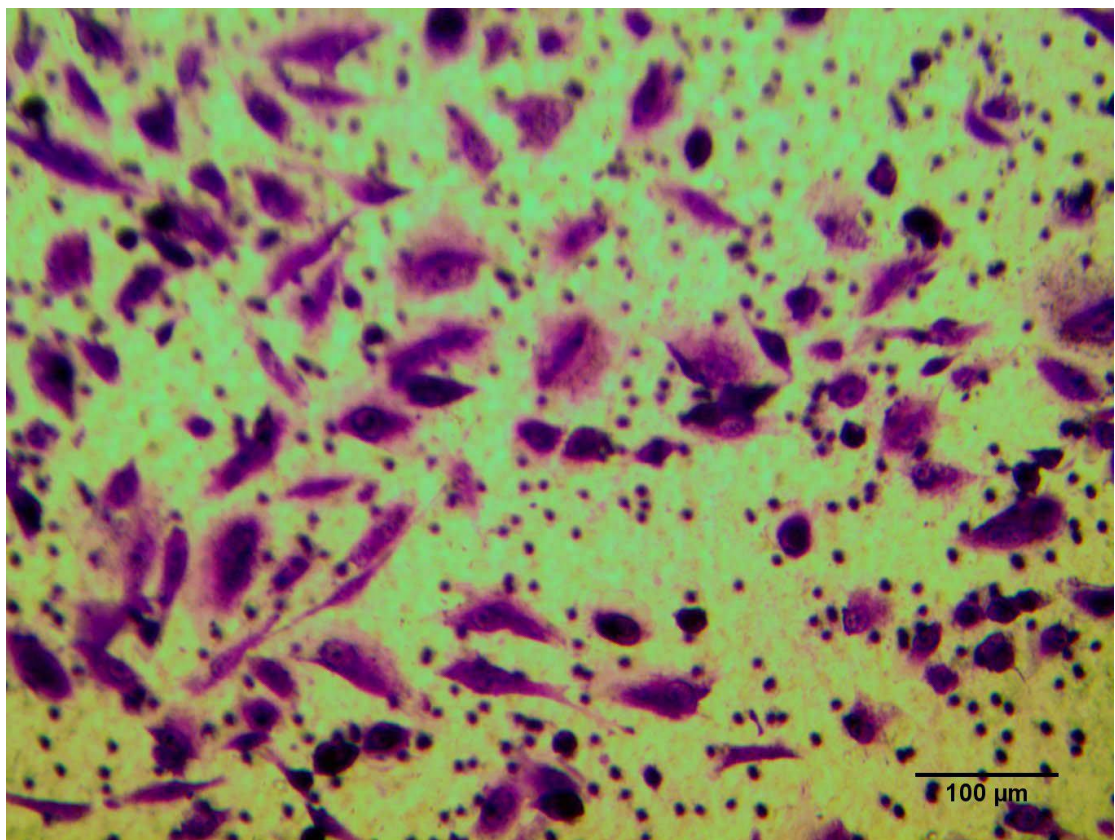

Transwell-SCC-4-Blank(4)

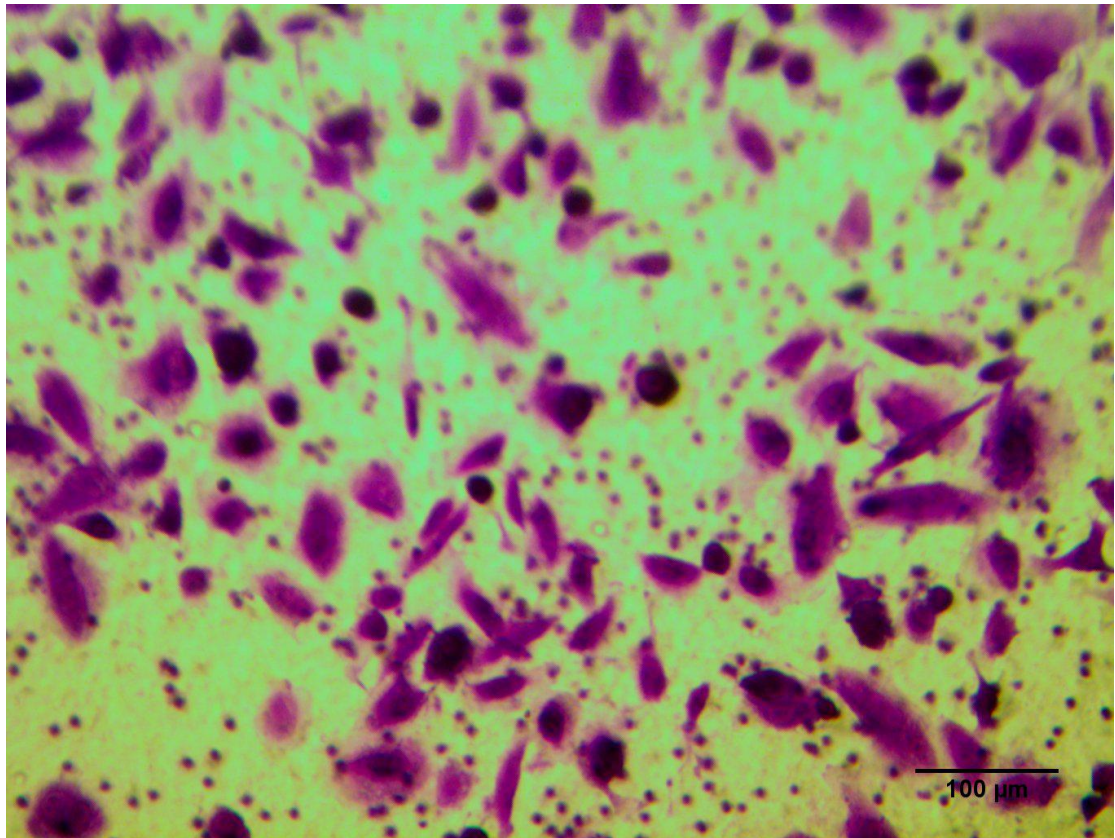

Transwell-SCC-4-Blank(5)

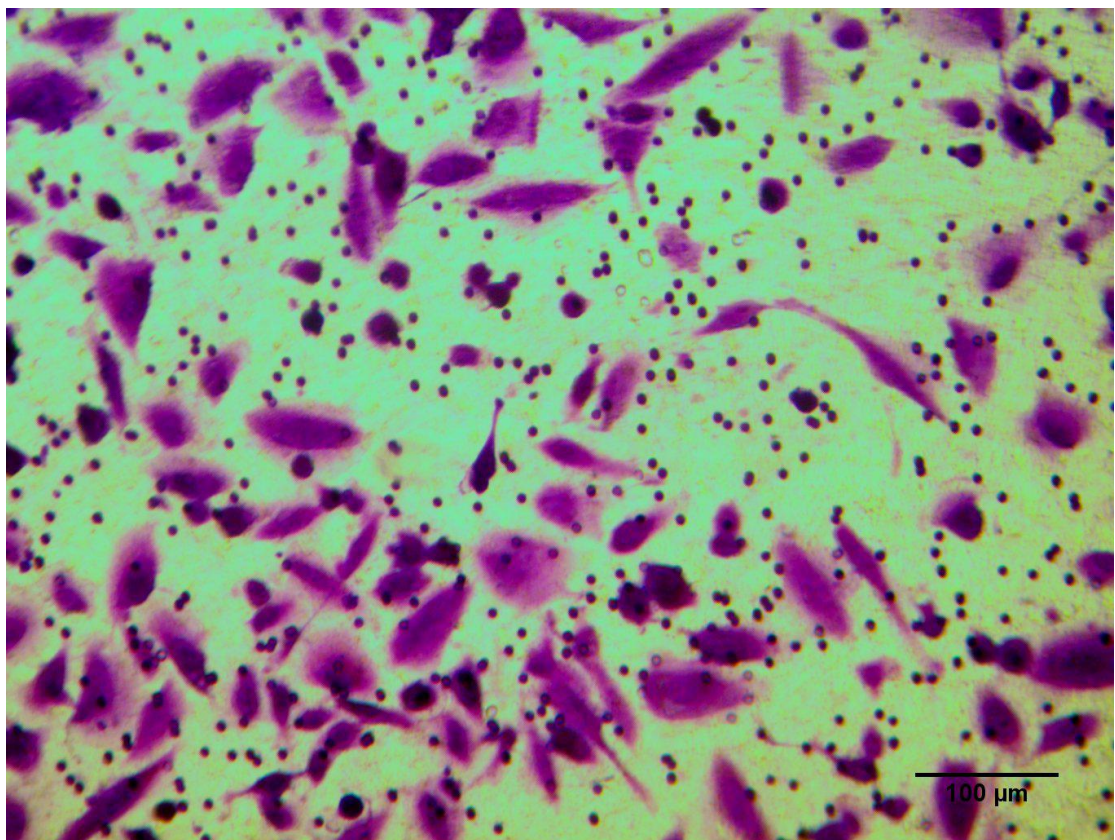

Transwell-SCC-4-NC(1)

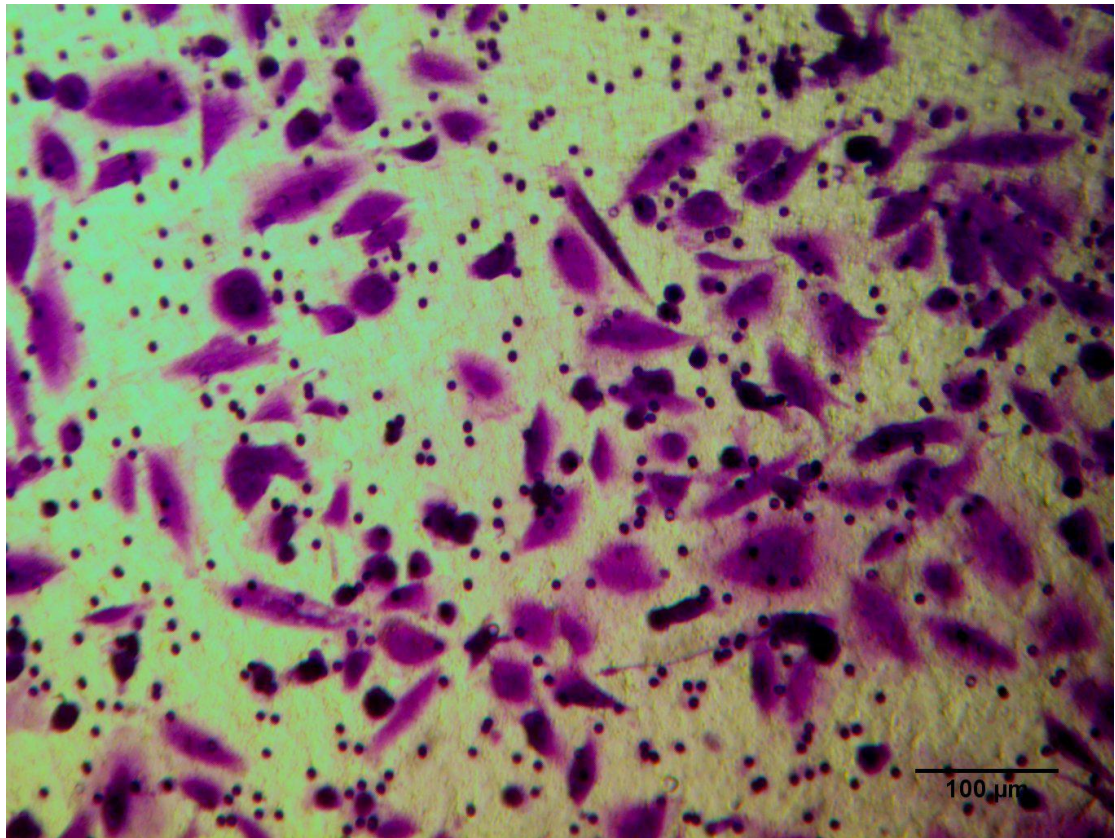

Transwell-SCC-4-NC(2)

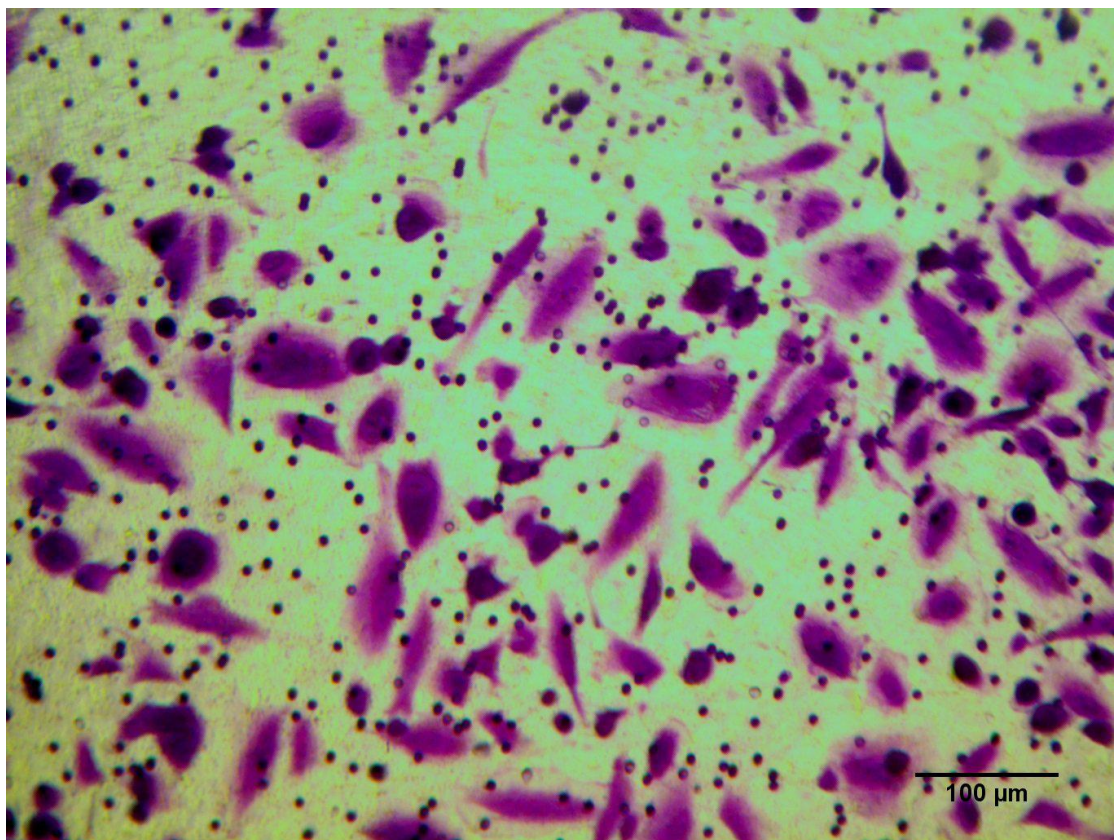

Transwell-SCC-4-NC(3)

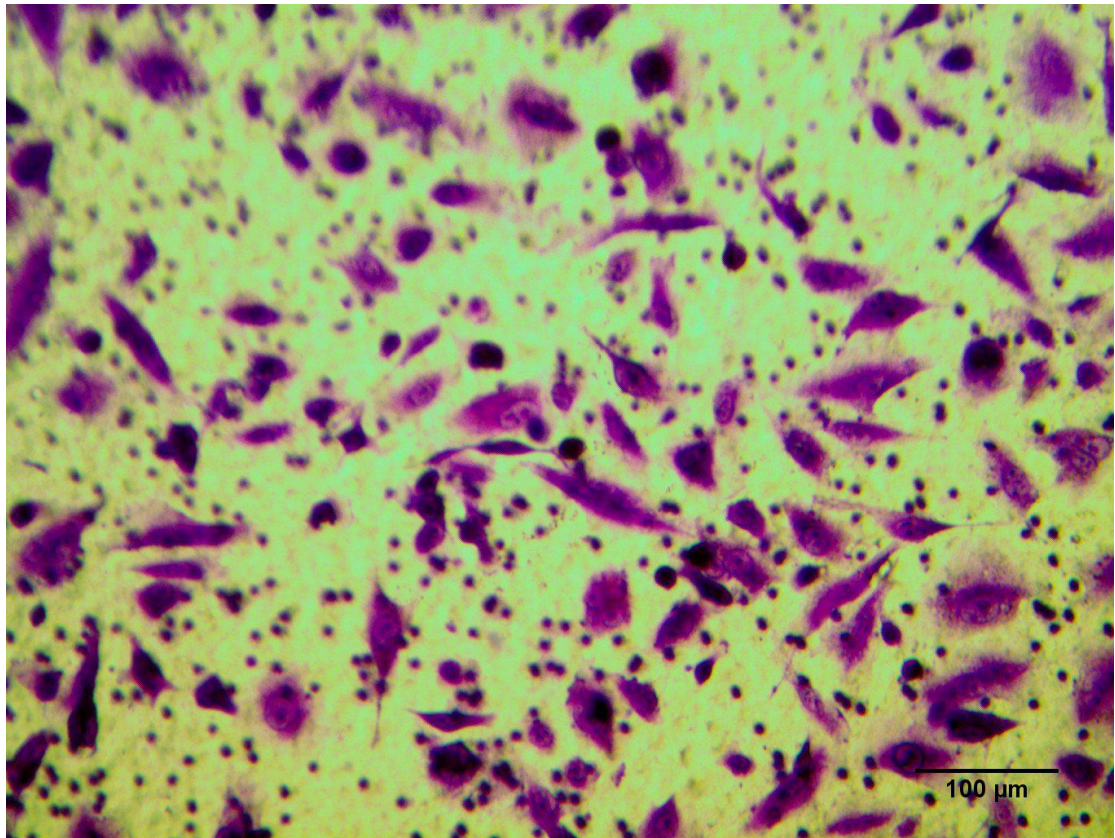

Transwell-SCC-4-NC(4)

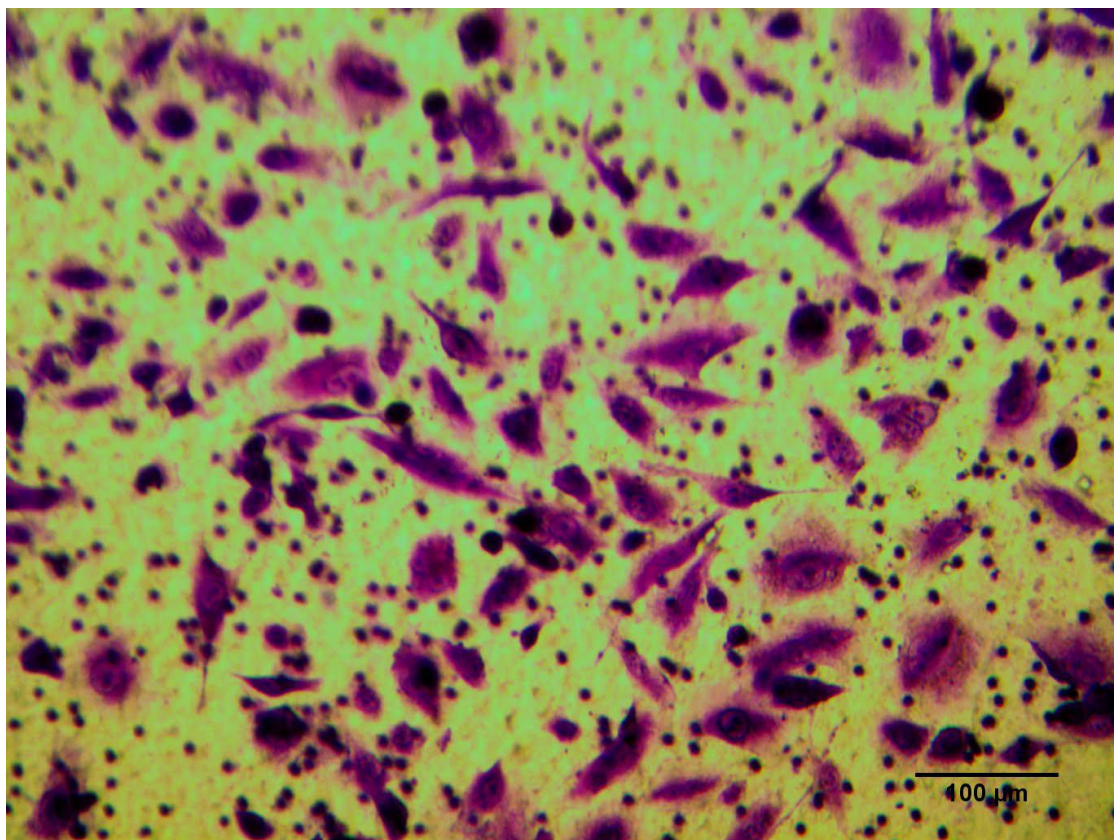

Transwell-SCC-4-NC(5)

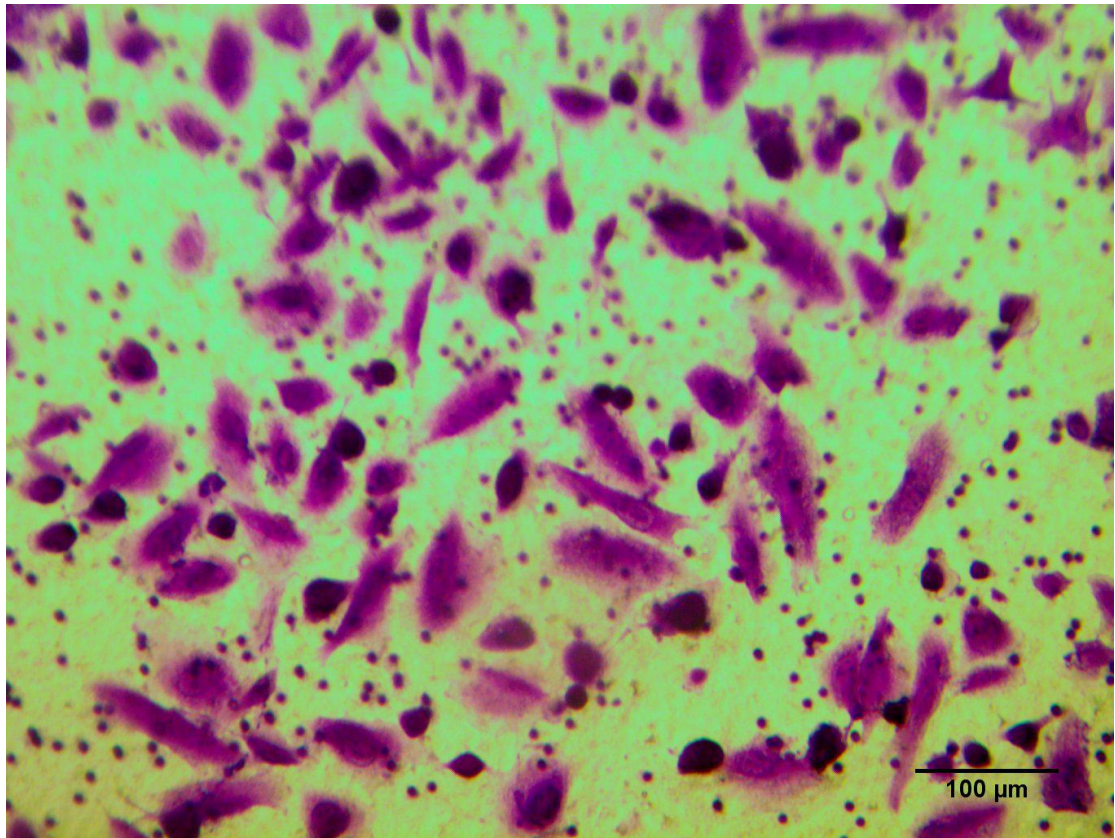

Transwell-SCC-4-siRNA(1)

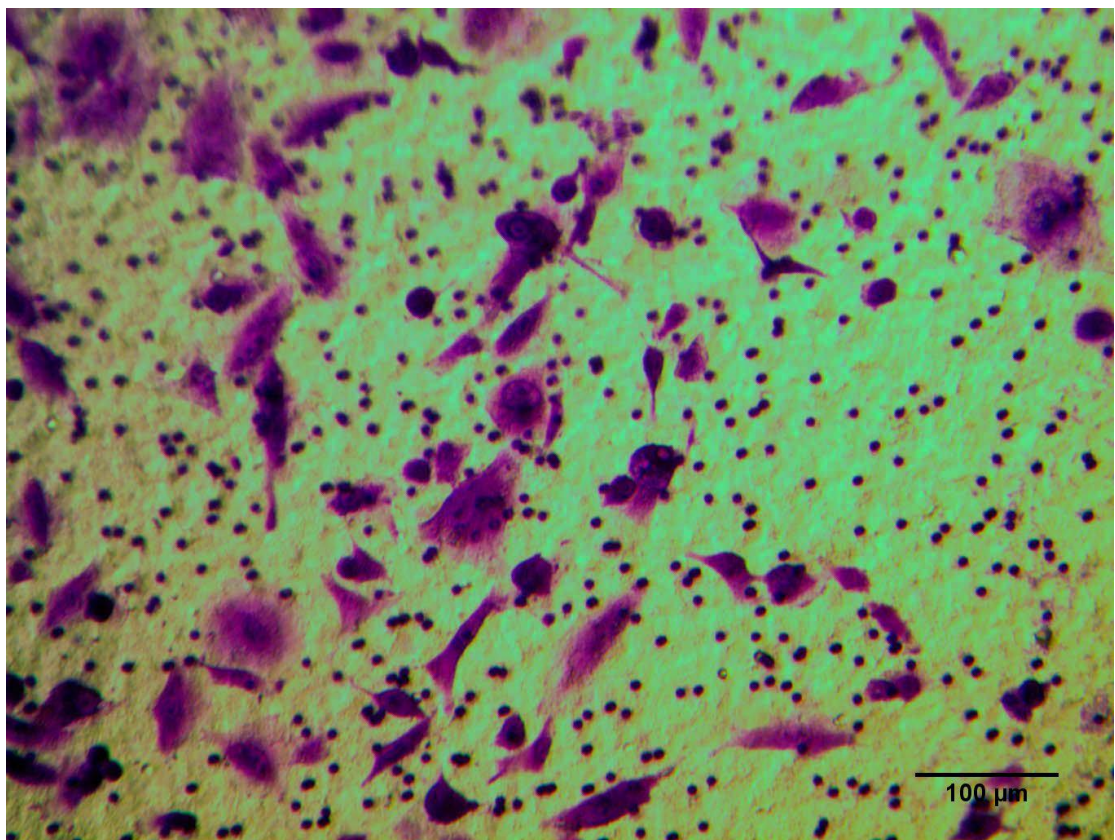

Transwell-SCC-4-siRNA(2)

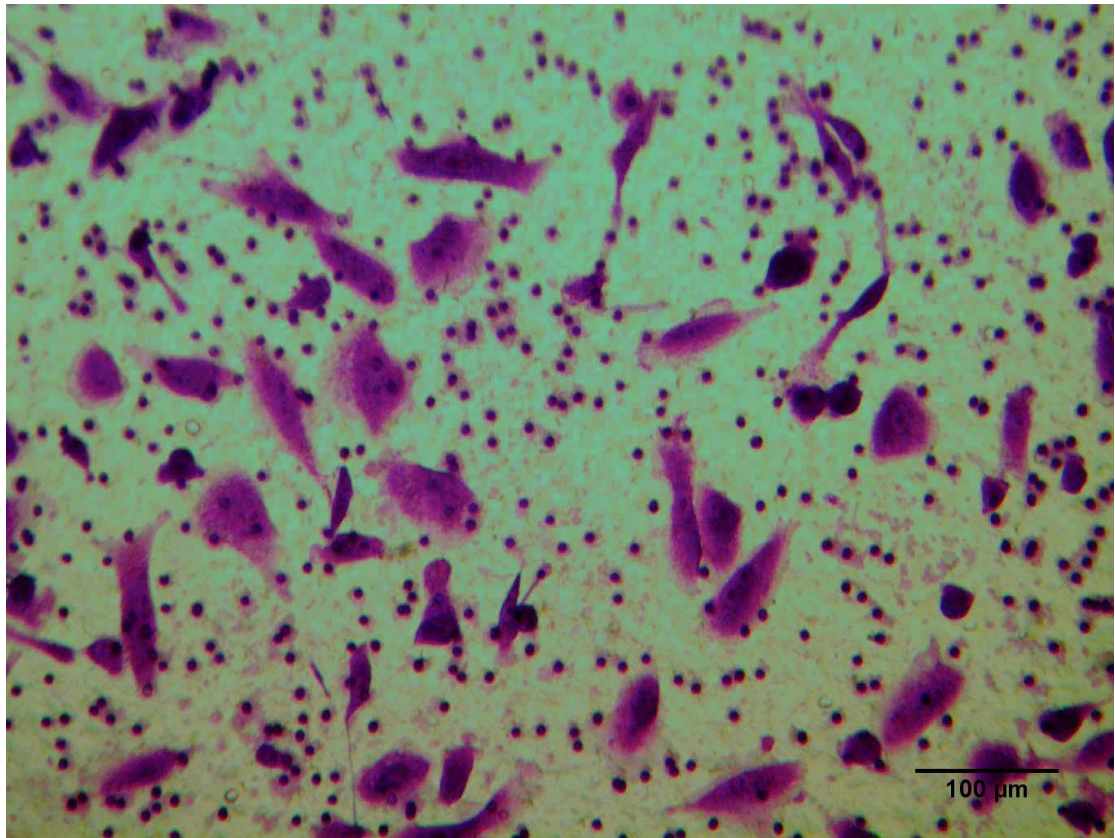

Transwell-SCC-4-siRNA(3)

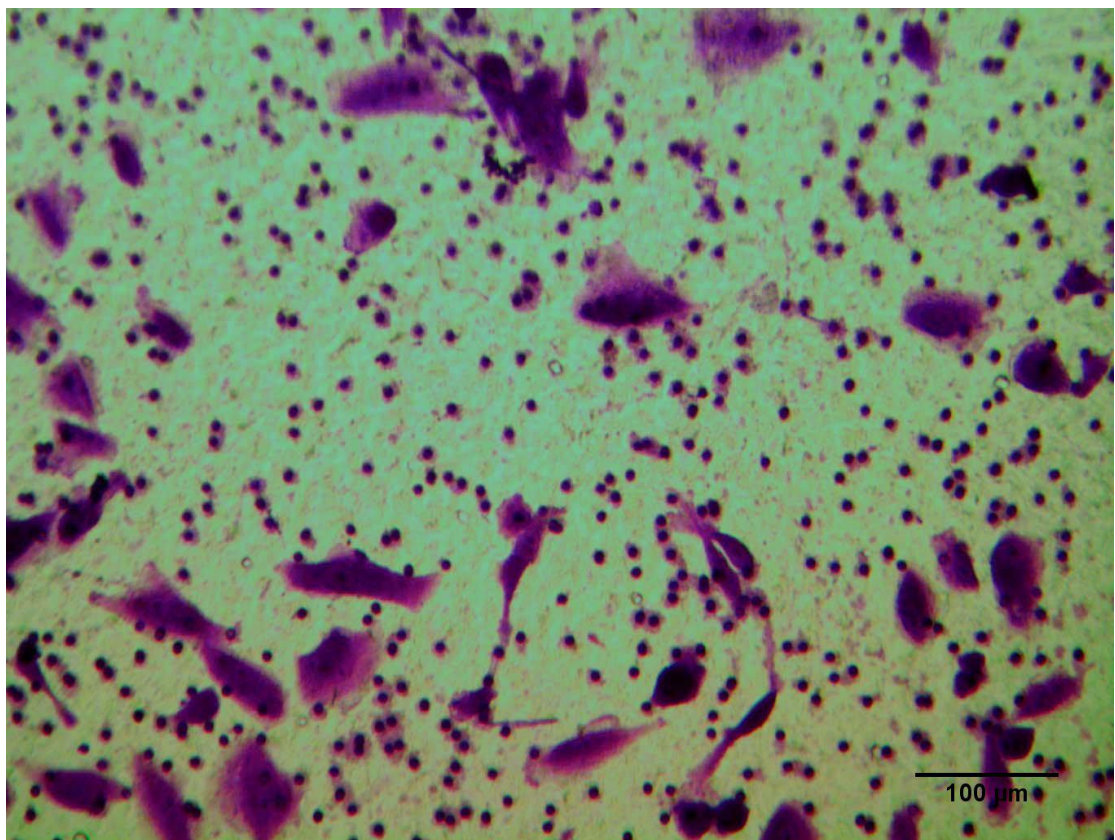

Transwell-SCC-4-siRNA(4)

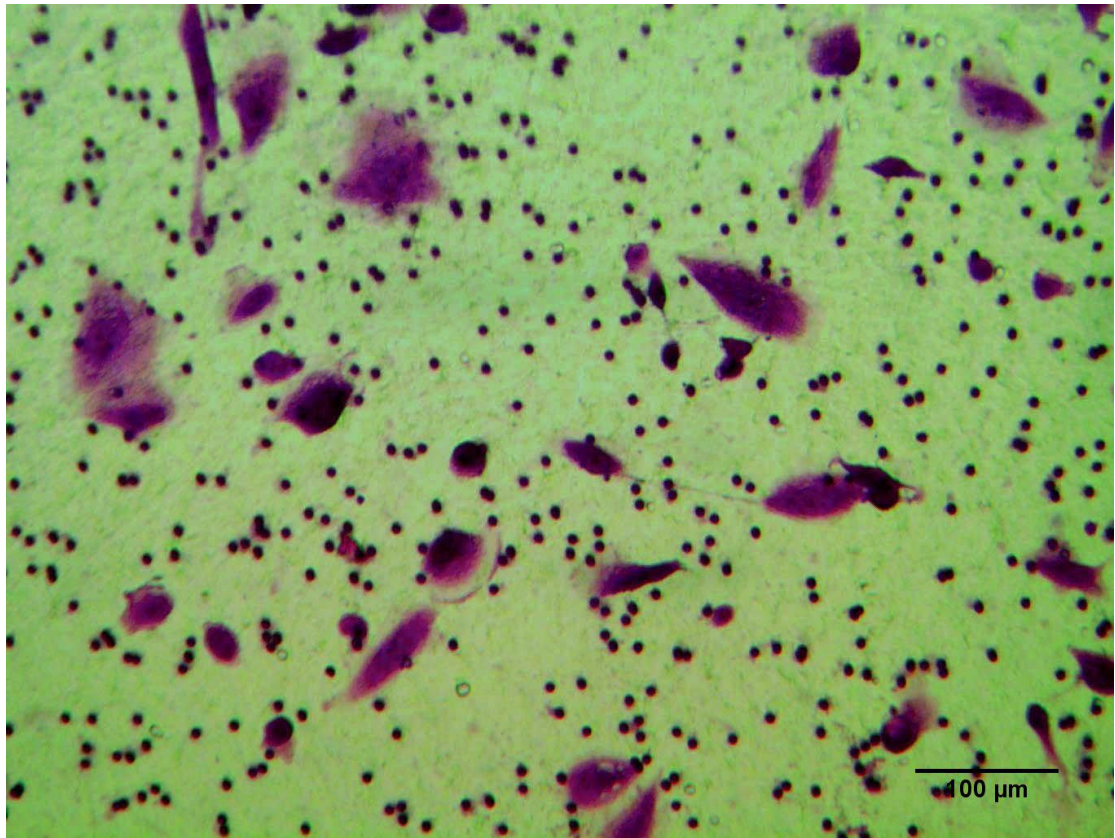

Transwell-SCC-4-siRNA(5)

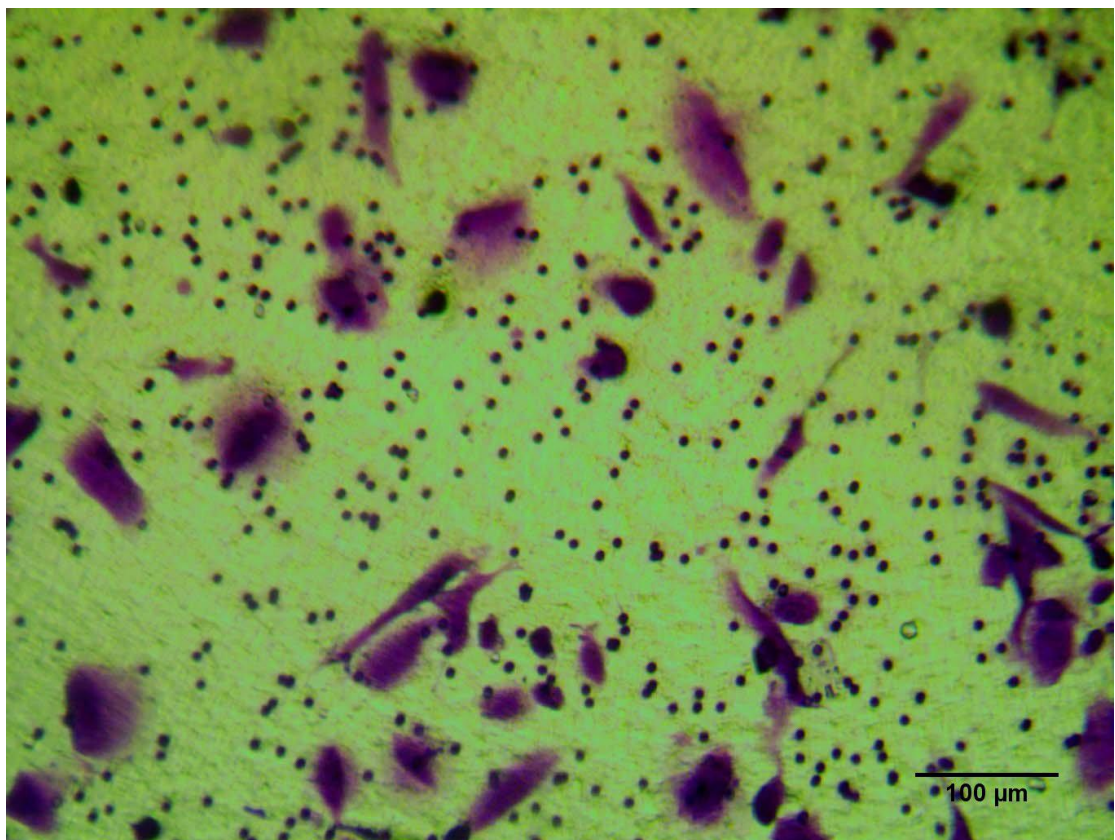



## Western blot

Fig.3 Original western blot1

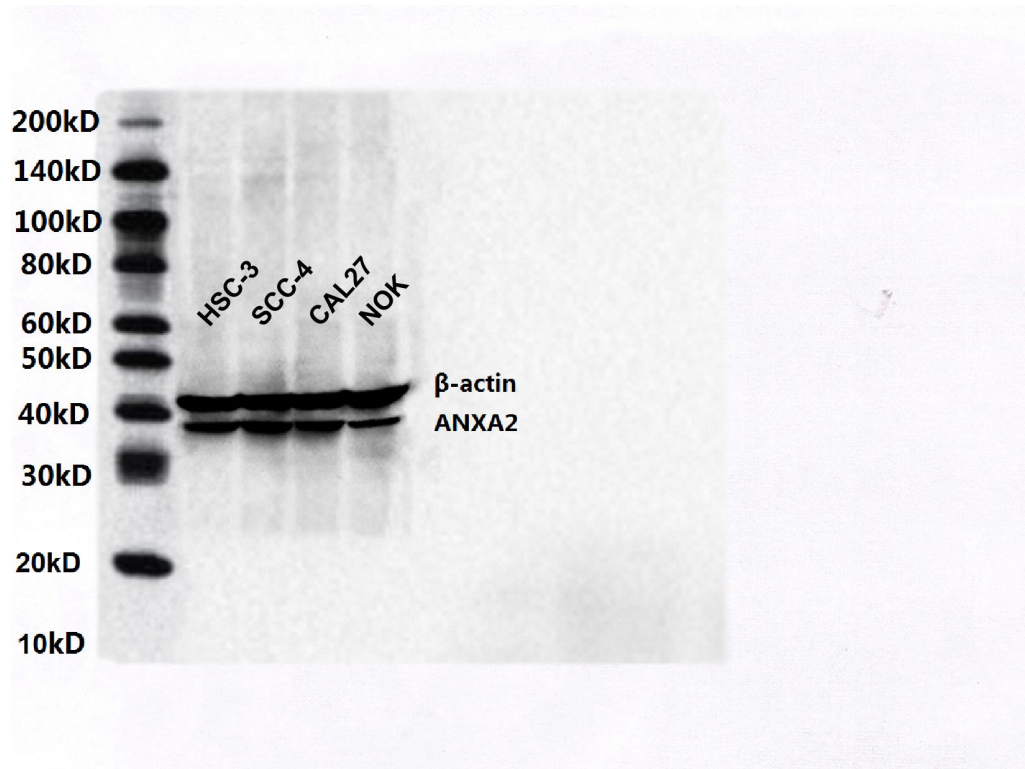

Fig.4 Original western blot1

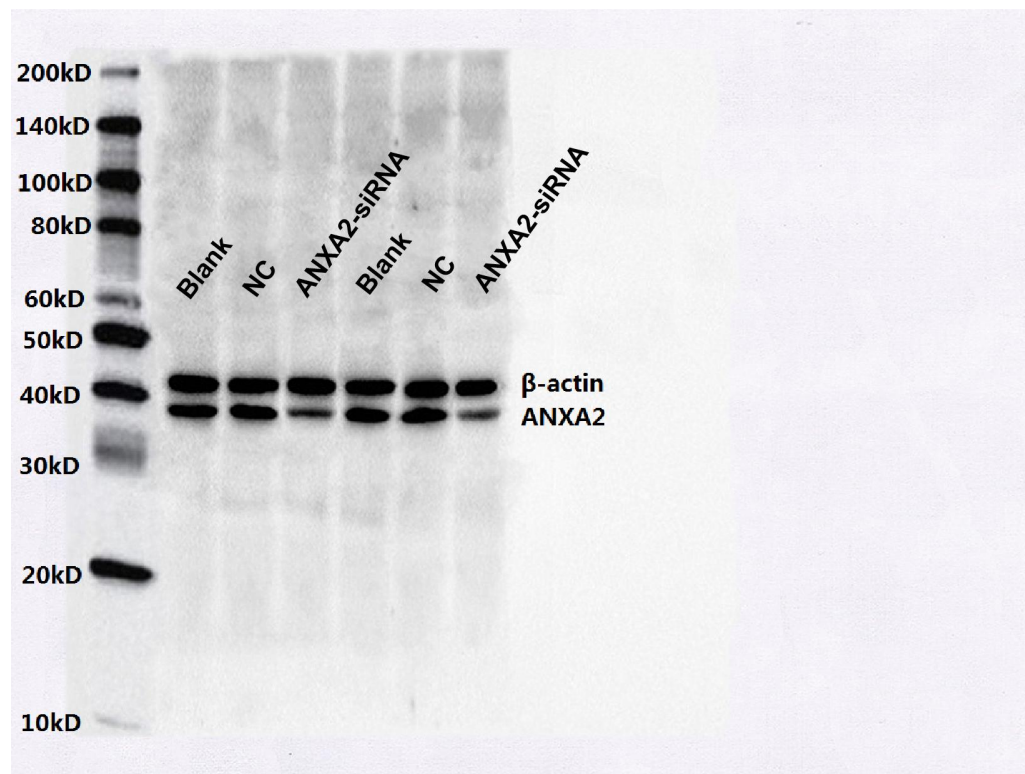

## Original Data

| No. | TNM stage | differentiation | LNM | staining intensity of IHC |                  |
|-----|-----------|-----------------|-----|---------------------------|------------------|
|     |           |                 |     | OSCC Tissue               | Noncancer tissue |
| 1   | I         | L               | Y   | 2                         | 1                |
| 2   | I         | L               | N   | 1                         | 0                |
| 3   | II        | M               | Y   | 3                         | 2                |
| 4   | I         | M               | Y   | 2                         | 1                |
| 5   | I         | L               | Y   | 2                         | 1                |
| 6   | I         | H               | N   | 1                         | 0                |
| 7   | II        | M               | Y   | 3                         | 2                |
| 8   | II        | M               | Y   | 3                         | 1                |
| 9   | III       | H               | N   | 2                         | 0                |
| 10  | IV        | H               | Y   | 3                         | 2                |
| 11  | I         | M               | N   | 1                         | 0                |
| 12  | III       | H               | N   | 1                         | 0                |
| 13  | III       | M               | N   | 2                         | 1                |
| 14  | I         | L               | N   | 0                         | 0                |
| 15  | III       | M               | N   | 2                         | 1                |
| 16  | I         | L               | Y   | 2                         | 0                |
| 17  | IV        | H               | N   | 3                         | 2                |
| 18  | III       | H               | N   | 3                         | 2                |
| 19  | III       | M               | N   | 2                         | 1                |
| 20  | II        | L               | N   | 3                         | 2                |
| 21  | III       | M               | N   | 2                         | 1                |
| 22  | III       | H               | N   | 1                         | 0                |
| 23  | IV        | H               | N   | 3                         | 1                |
| 24  | III       | M               | N   | 2                         | 1                |
| 25  | I         | L               | Y   | 2                         | 0                |
| 26  | I         | L               | Y   | 2                         | 1                |
| 27  | II        | M               | N   | 3                         | 2                |

|    |     |   |   |   |   |
|----|-----|---|---|---|---|
| 28 | II  | M | N | 2 | 1 |
| 29 | I   | L | Y | 2 | 1 |
| 30 | I   | L | Y | 2 | 1 |
| 31 | I   | H | N | 1 | 0 |
| 32 | II  | M | N | 3 | 2 |
| 33 | II  | M | N | 3 | 2 |
| 34 | I   | L | Y | 2 | 0 |
| 35 | II  | M | N | 3 | 2 |
| 36 | I   | L | Y | 2 | 0 |
| 37 | II  | H | N | 1 | 0 |
| 38 | III | H | N | 3 | 1 |
| 39 | III | H | N | 3 | 1 |
| 40 | I   | L | N | 0 | 0 |
| 41 | III | H | N | 1 | 0 |
| 42 | IV  | H | N | 3 | 2 |
| 43 | III | H | N | 2 | 0 |
| 44 | III | M | N | 2 | 0 |
| 45 | III | H | N | 3 | 1 |
| 46 | III | H | N | 3 | 1 |
| 47 | I   | L | Y | 2 | 0 |
| 48 | II  | H | N | 1 | 0 |
| 49 | II  | M | N | 3 | 2 |
| 50 | I   | M | Y | 2 | 1 |
| 51 | I   | M | Y | 2 | 1 |
| 52 | II  | M | N | 3 | 1 |
| 53 | II  | M | N | 3 | 2 |
| 54 | I   | L | Y | 2 | 1 |
| 55 | II  | M | N | 3 | 2 |
| 56 | II  | L | N | 2 | 1 |
| 57 | III | M | N | 2 | 1 |

|    |     |   |   |   |   |
|----|-----|---|---|---|---|
| 58 | IV  | H | N | 3 | 2 |
| 59 | II  | H | N | 1 | 0 |
| 60 | III | M | N | 2 | 1 |
| 61 | II  | L | N | 0 | 0 |
| 62 | III | M | N | 2 | 1 |
| 63 | III | H | N | 3 | 2 |
| 64 | I   | L | Y | 2 | 1 |
| 65 | I   | L | Y | 3 | 1 |
| 66 | I   | H | N | 1 | 1 |
| 67 | II  | M | N | 3 | 1 |
| 68 | I   | M | Y | 3 | 0 |
| 69 | I   | L | N | 1 | 0 |
| 70 | III | M | N | 2 | 1 |
| 71 | III | H | N | 3 | 2 |
| 72 | III | M | N | 2 | 0 |
| 73 | IV  | H | N | 3 | 1 |
| 74 | I   | M | N | 1 | 0 |
| 75 | III | M | N | 2 | 0 |
| 76 | III | L | N | 2 | 0 |
| 77 | II  | H | N | 1 | 1 |
| 78 | III | M | N | 2 | 0 |
| 79 | III | H | N | 3 | 2 |
| 80 | III | M | N | 2 | 0 |
| 81 | III | H | N | 3 | 1 |
| 82 | II  | H | N | 1 | 0 |
| 83 | II  | M | N | 3 | 2 |
| 84 | II  | L | Y | 2 | 0 |
| 85 | I   | L | Y | 2 | 1 |
| 86 | II  | M | N | 1 | 0 |
| 87 | I   | L | Y | 2 | 1 |

|     |     |   |   |   |   |
|-----|-----|---|---|---|---|
| 88  | I   | L | Y | 2 | 0 |
| 89  | II  | M | N | 3 | 1 |
| 90  | I   | L | N | 2 | 0 |
| 91  | III | H | N | 2 | 0 |
| 92  | II  | H | N | 1 | 1 |
| 93  | III | M | N | 2 | 0 |
| 94  | IV  | H | N | 3 | 1 |
| 95  | III | H | N | 2 | 1 |
| 96  | II  | H | N | 1 | 0 |
| 97  | III | M | N | 2 | 0 |
| 98  | III | M | N | 2 | 0 |
| 99  | I   | L | N | 0 | 0 |
| 100 | II  | L | N | 1 | 0 |
| 101 | III | H | N | 1 | 1 |
| 102 | III | H | N | 3 | 2 |
| 103 | III | M | N | 2 | 0 |
| 104 | III | H | N | 3 | 2 |
| 105 | III | M | N | 2 | 0 |
| 106 | III | H | N | 3 | 2 |
| 107 | III | H | N | 1 | 1 |
| 108 | III | M | N | 2 | 1 |
| 109 | II  | M | N | 3 | 2 |
| 110 | I   | L | Y | 2 | 1 |
| 111 | III | M | Y | 1 | 1 |
| 112 | III | H | N | 1 | 1 |
| 113 | II  | M | N | 3 | 2 |
| 114 | III | H | N | 3 | 2 |
| 115 | II  | L | N | 2 | 0 |
| 116 | II  | H | N | 3 | 2 |
| 117 | II  | M | N | 3 | 2 |

|     |     |   |   |   |   |
|-----|-----|---|---|---|---|
| 118 | II  | L | Y | 2 | 0 |
| 119 | III | H | N | 2 | 1 |
| 120 | IV  | H | N | 3 | 2 |
| 121 | III | H | N | 3 | 2 |
| 122 | II  | L | N | 3 | 2 |
| 123 | II  | L | N | 2 | 0 |
| 124 | IV  | H | Y | 1 | 1 |

|      |              |       |              |              |
|------|--------------|-------|--------------|--------------|
| Note | L=low        | N=no  | 0~1=negative | 0~1=negative |
|      | M=moderately | Y=yes | 2~3=positive | 2~3=positive |
|      | H=high       |       |              |              |
